# Supplementary material
Source: Springer Nature journal article supplement (https://www.springermedizin.de/resource/supplementary/13075_2013_4445_MOESM6_ESM.pdf/10110424)

control

TGF- $\beta$ 1

TGF- $\beta$ 1+  
A83-01

MCS

MCS+  
A83-01

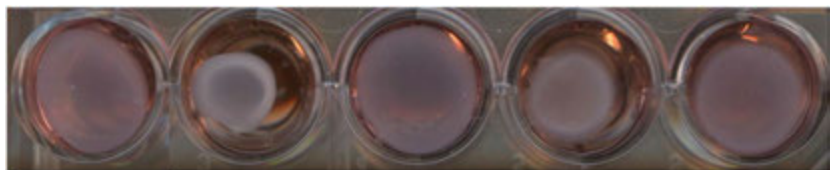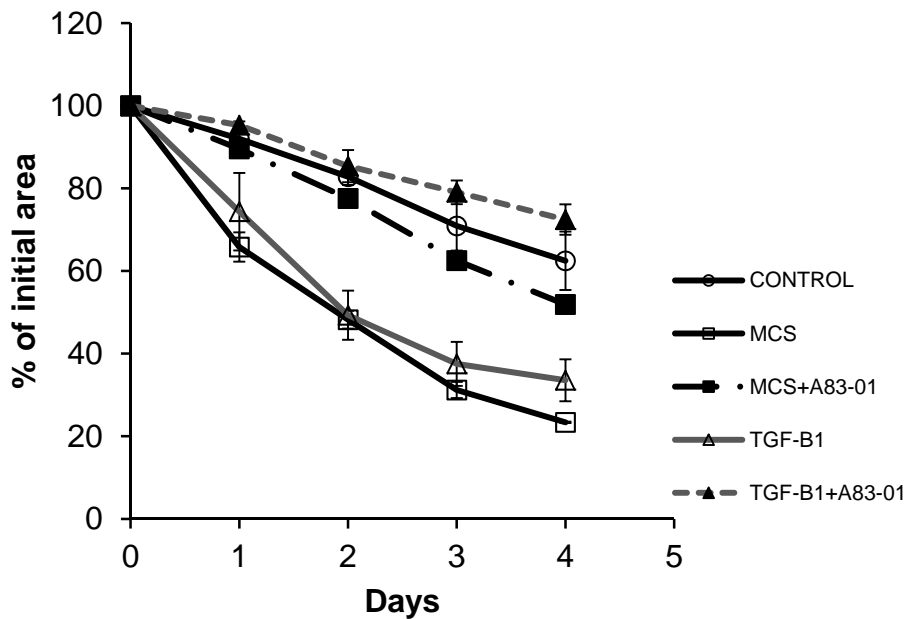

Supplement: MOESM6 [file 10110424]
